# Supplementary figures and images for: New phase sequences in banana-shaped mesogens: influence of fluorine substituent in compounds derived from 2,7-dihydroxynaphthalene
Source: Royal Society of Chemistry journal article supplement (doi:10.1039/b313295a), 2004-01-01

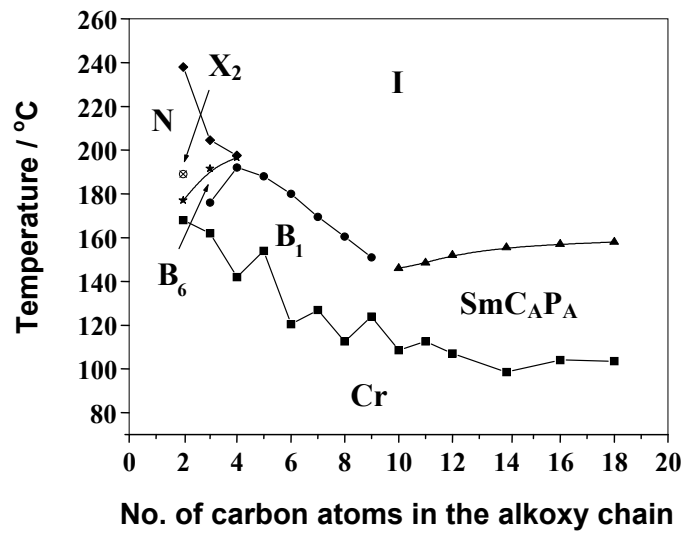

Supplement: figs1.pdf [file figs1.pdf]

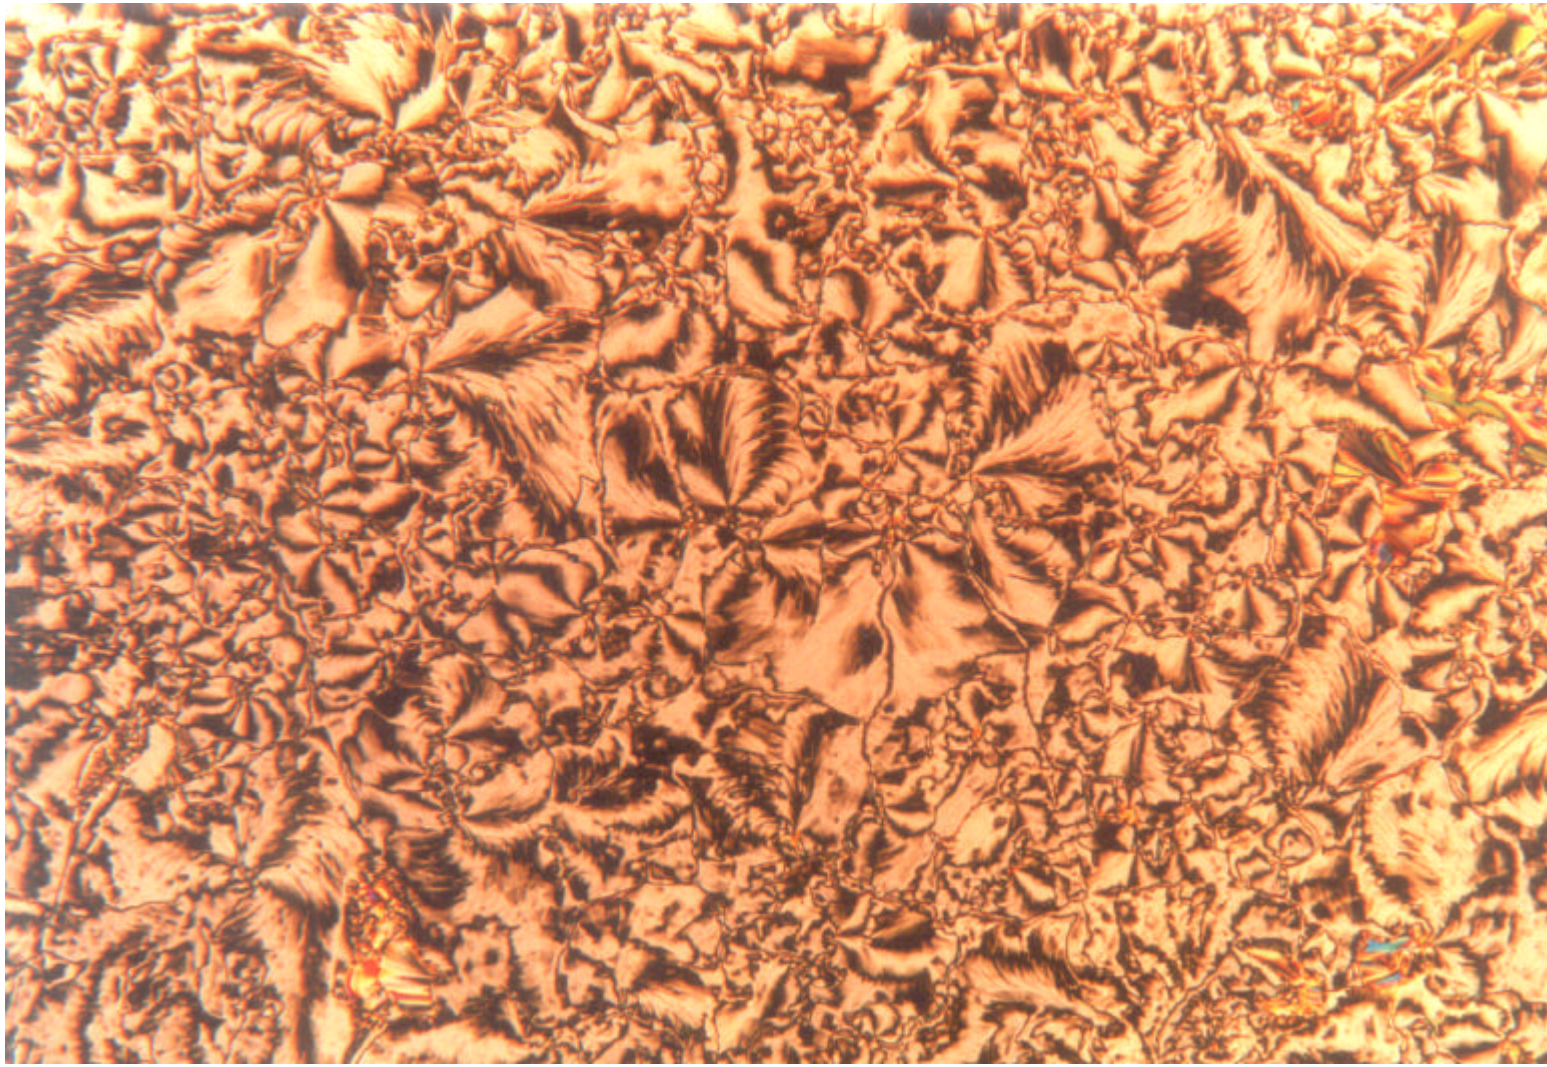

Supplement: figs2.pdf [file figs2.pdf]

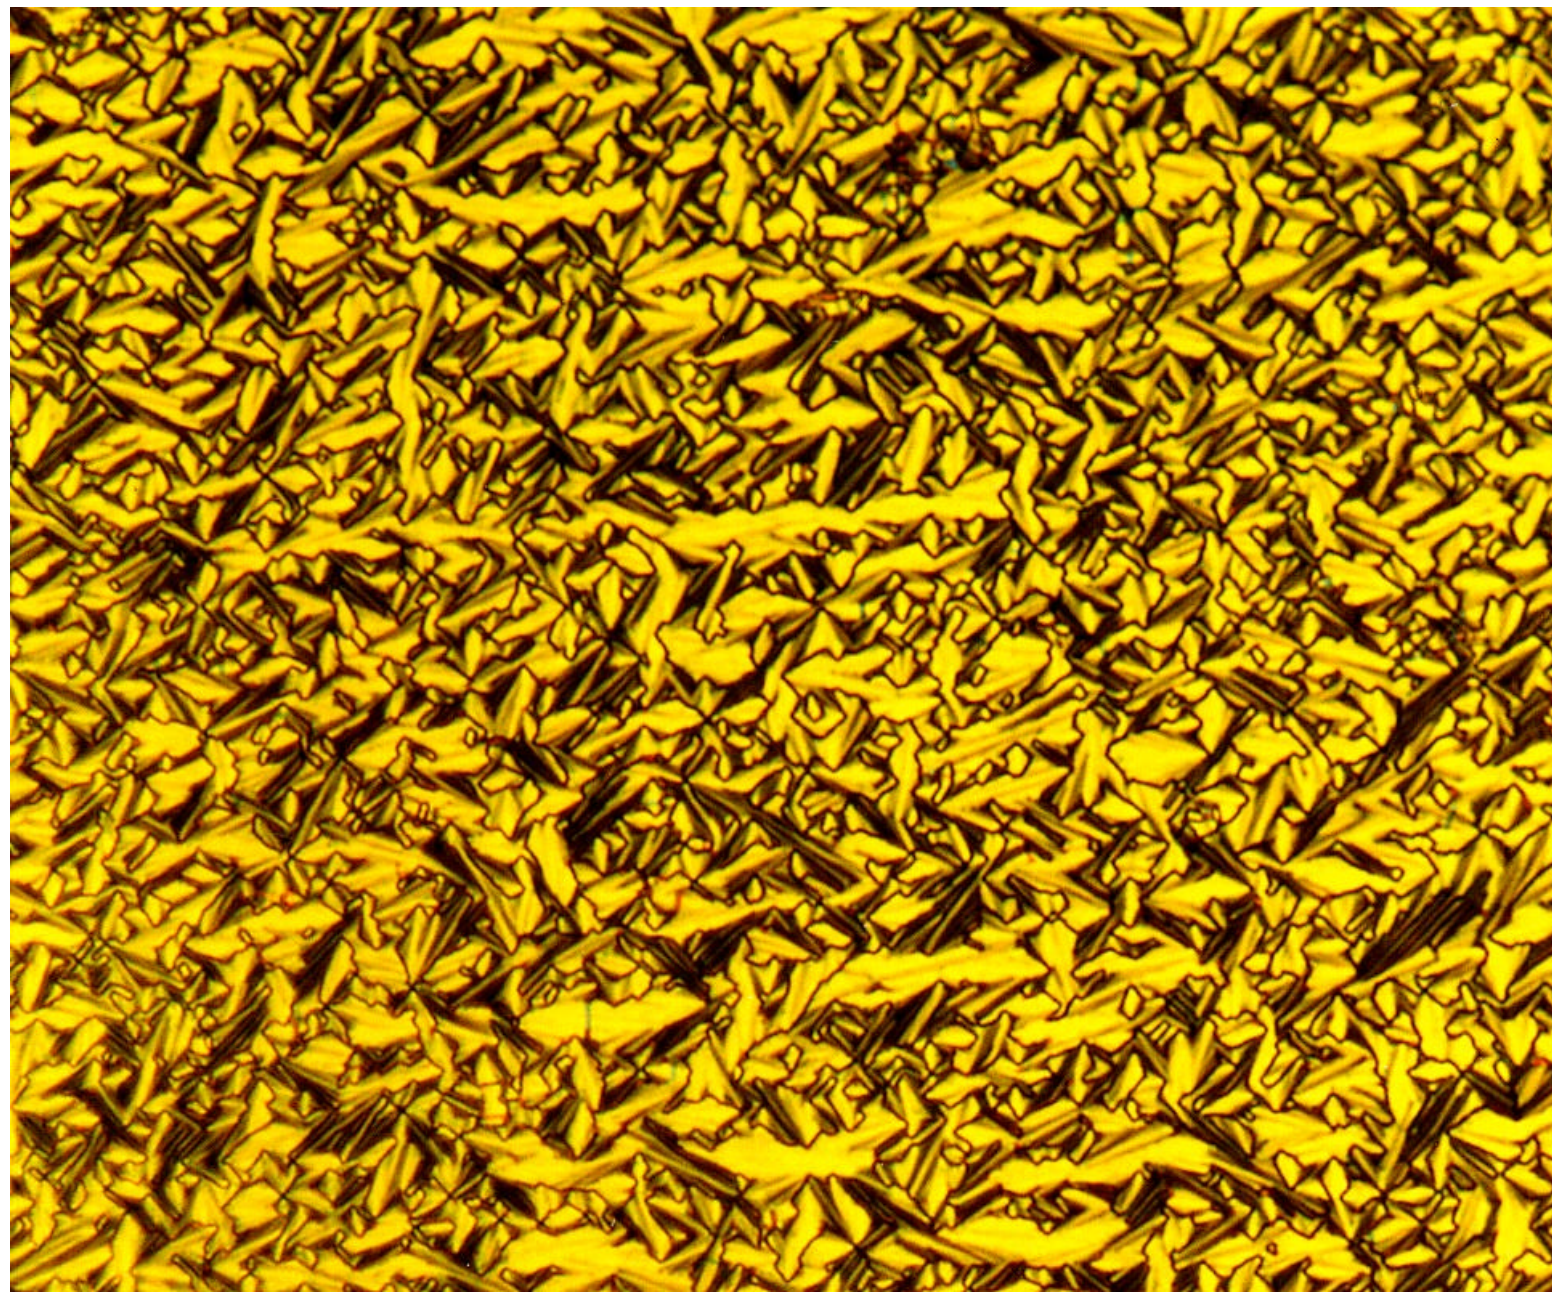

Supplement: figs3.pdf [file figs3.pdf]
